# Supplementary material for: A mitogenomic phylogeny of chitons (Mollusca: Polyplacophora)
Source: Springer Nature journal article supplement (doi:10.1186/s12862-019-1573-2), 2020-02-05
Supplement: 12862_2019_1573_MOESM4_ESM.pdf [file 12862_2019_1573_MOESM4_ESM.pdf]

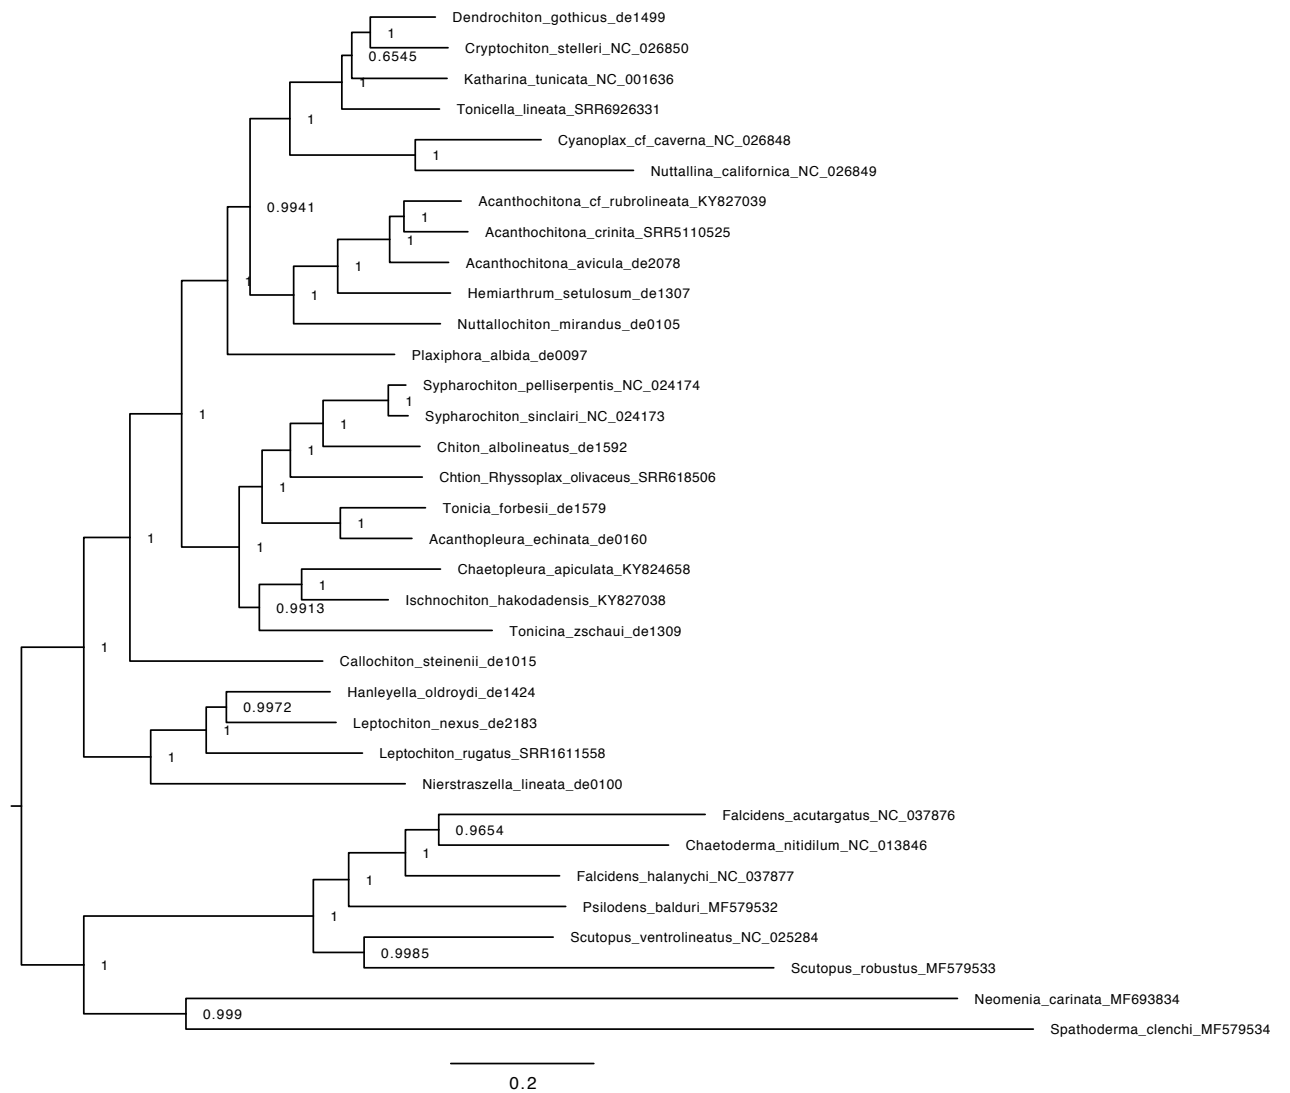

Partitioned Bayesian phylogram inferred from the combined (protein + rRNA) dataset in MrBayes. Numbers at nodes are posterior probabilities and scale bar is in expected substitutions site<sup>-1</sup>.

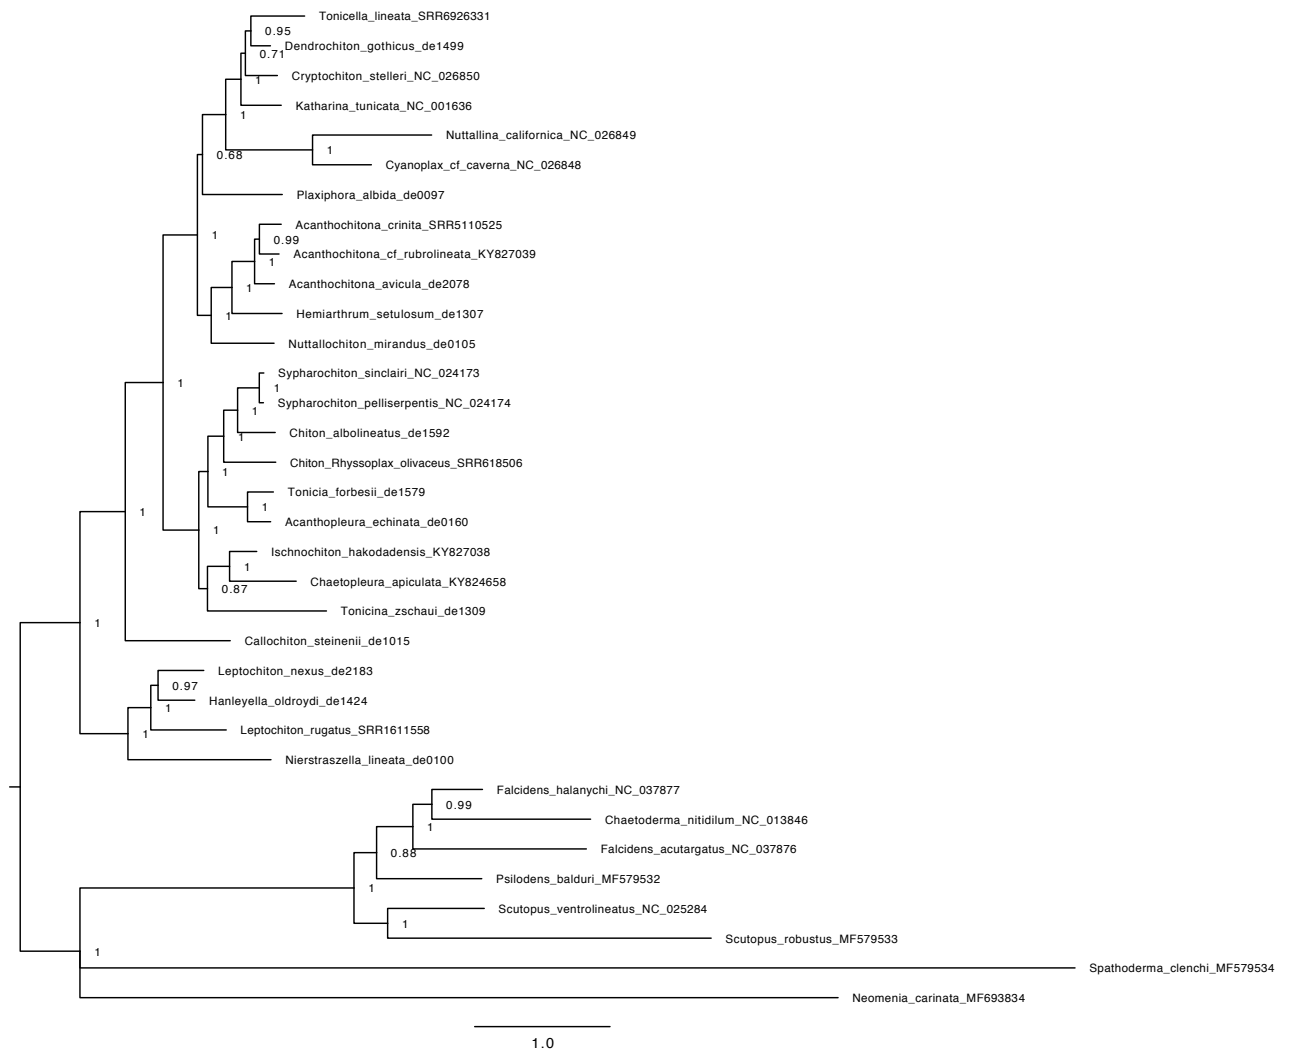

Bayesian phylogram inferred from the protein dataset under the CAT-GTR+ $\Gamma$ 4 model in PhyloBayes. Numbers at nodes are posterior probabilities and scale bar is in expected substitutions site<sup>-1</sup>.

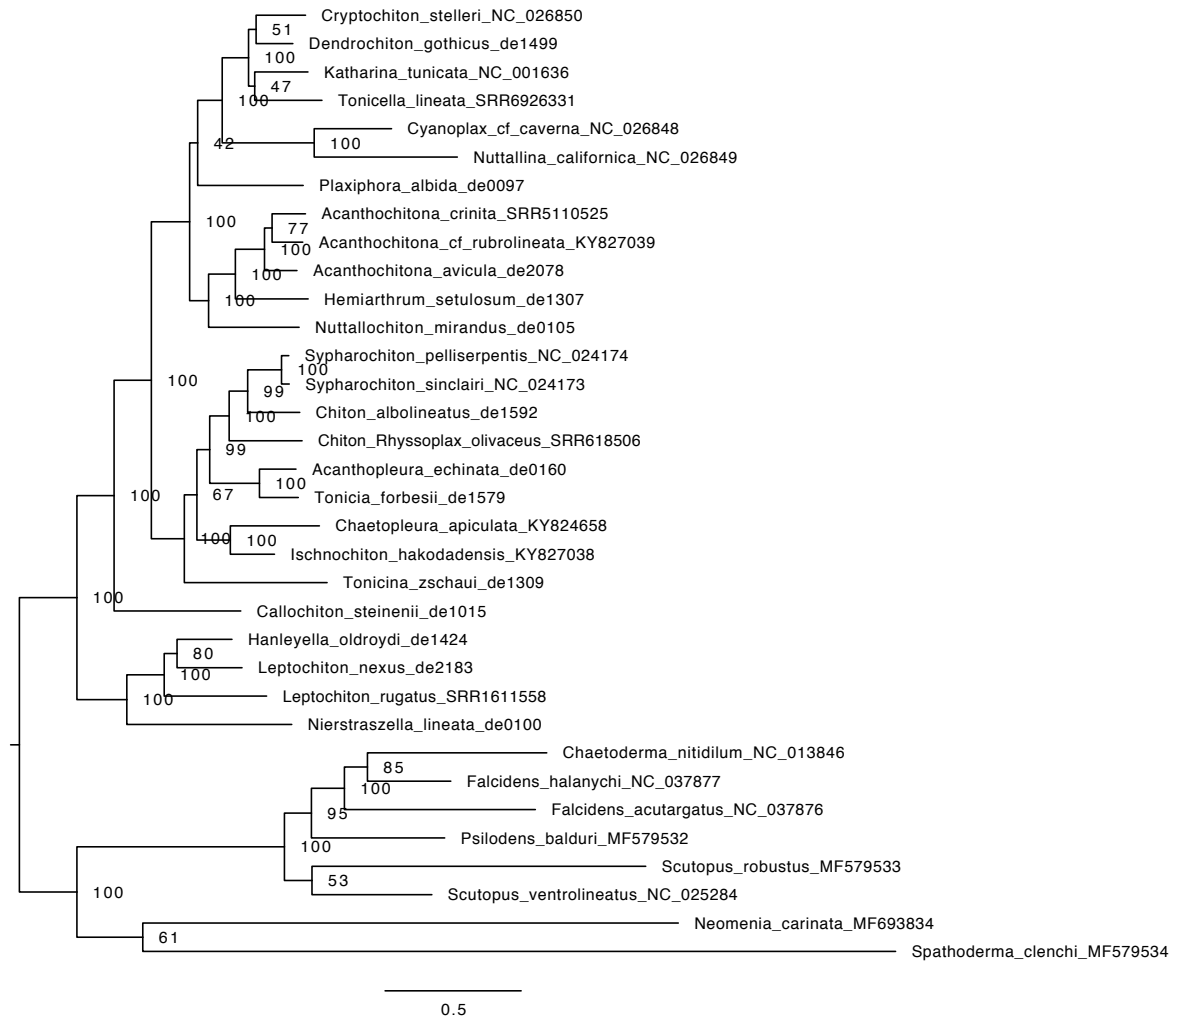

Maximum likelihood phylogram inferred from the protein dataset under the mtZOA+F+I+Γ4 model in IQTREE. Numbers at nodes are non-parametric bootstrap proportions (%) and scale bar is in expected substitutions site<sup>-1</sup>.

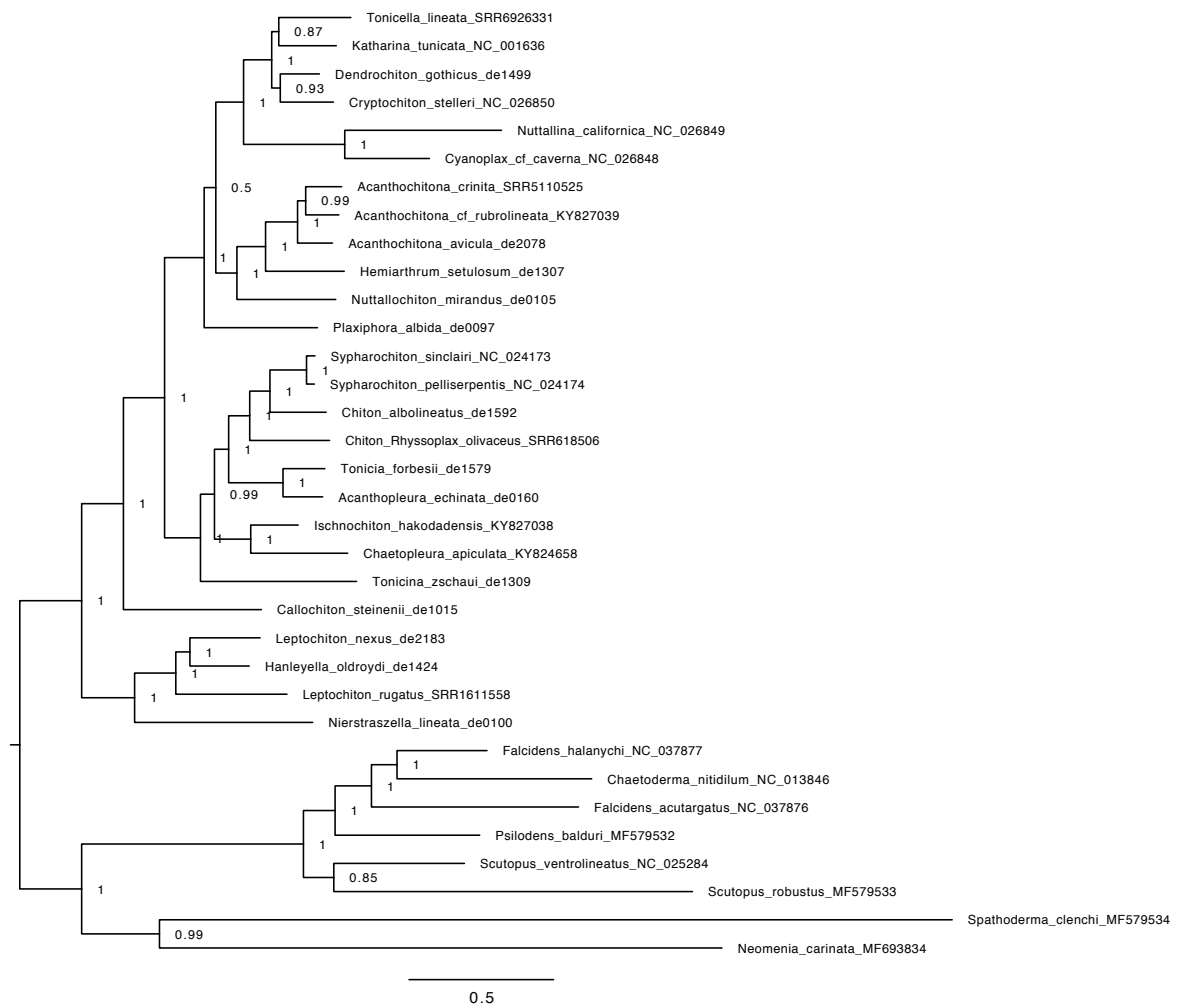

Bayesian phylogram inferred from the protein dataset under the mtZOA+ $\Gamma$ 4 model in PhyloBayes. Numbers at nodes are posterior probabilities and scale bar is in expected substitutions site<sup>-1</sup>.
