# Supplementary material for: A mitogenomic phylogeny of chitons (Mollusca: Polyplacophora)
Source: Springer Nature journal article supplement (doi:10.1186/s12862-019-1573-2), 2020-02-05

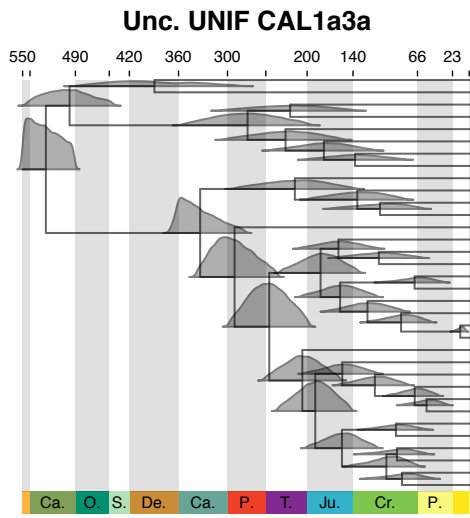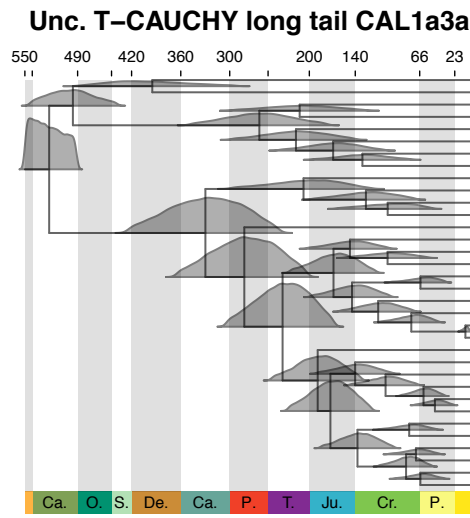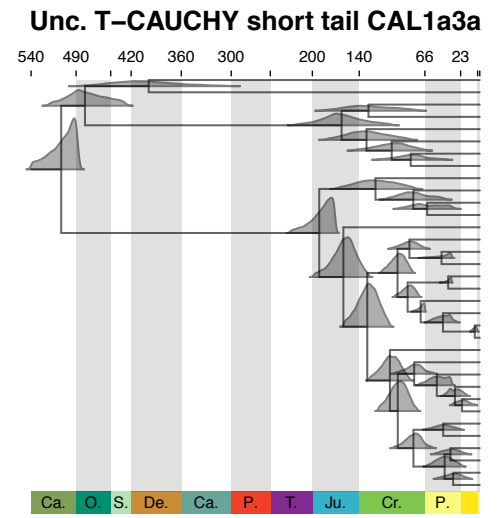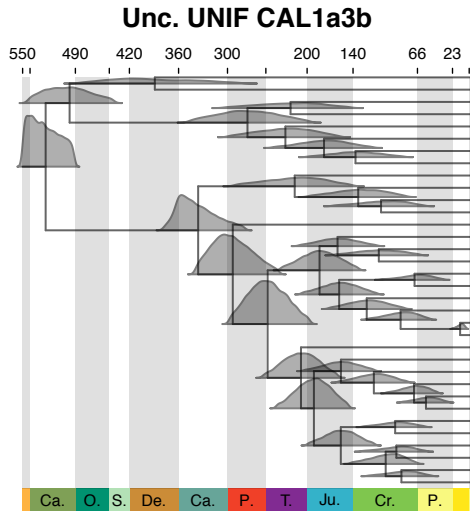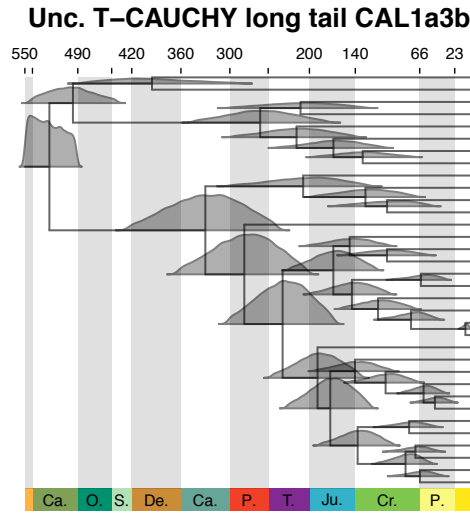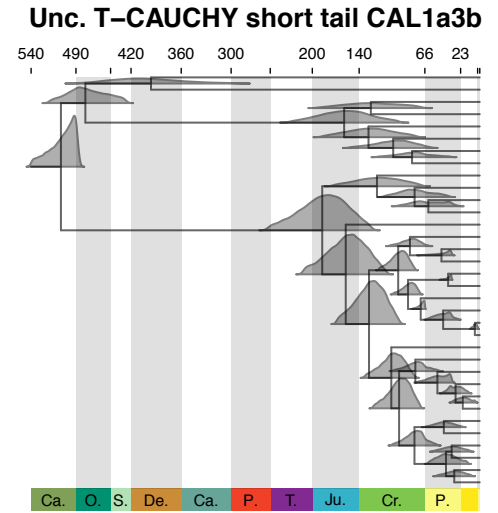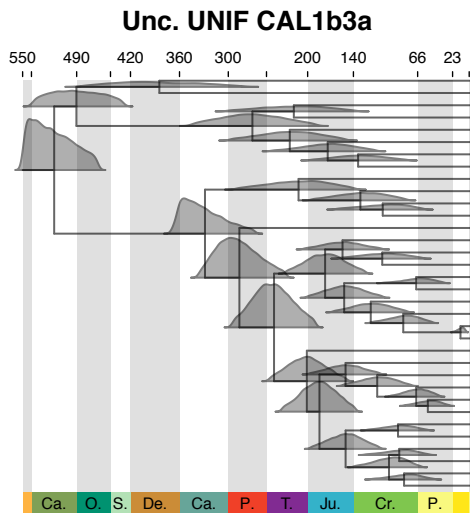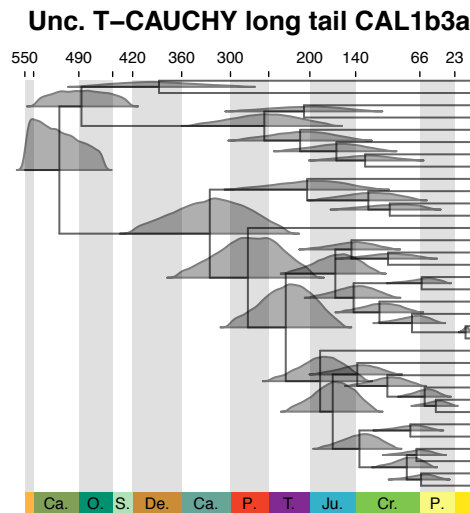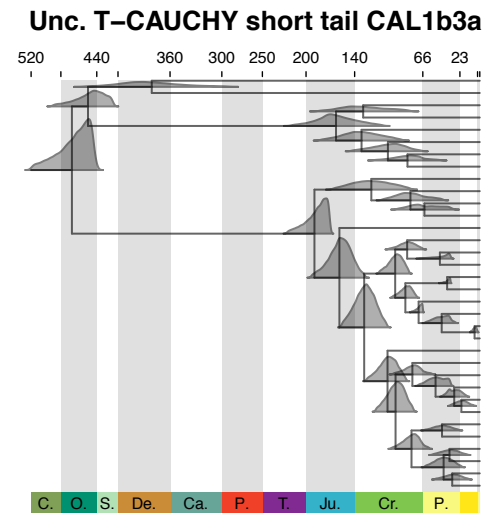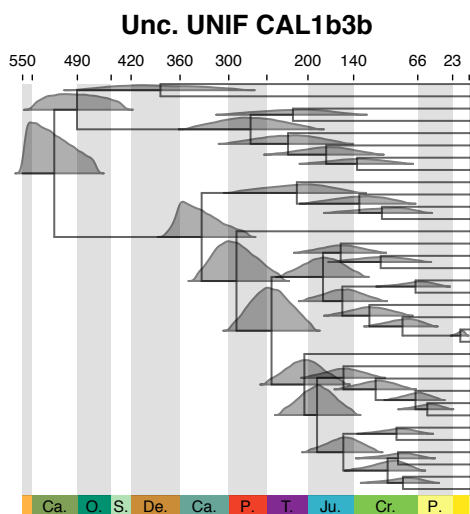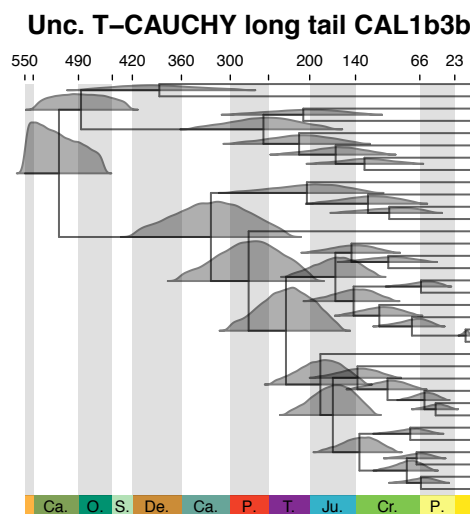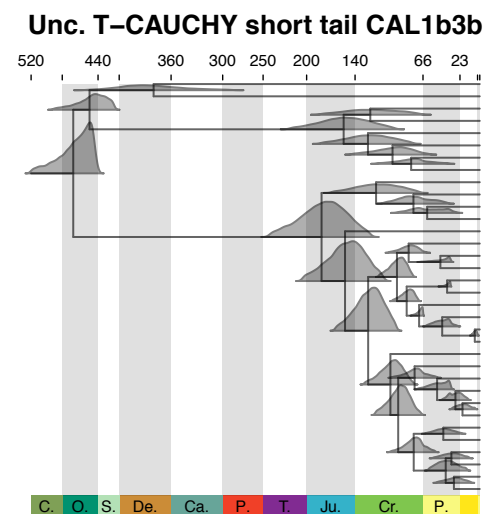



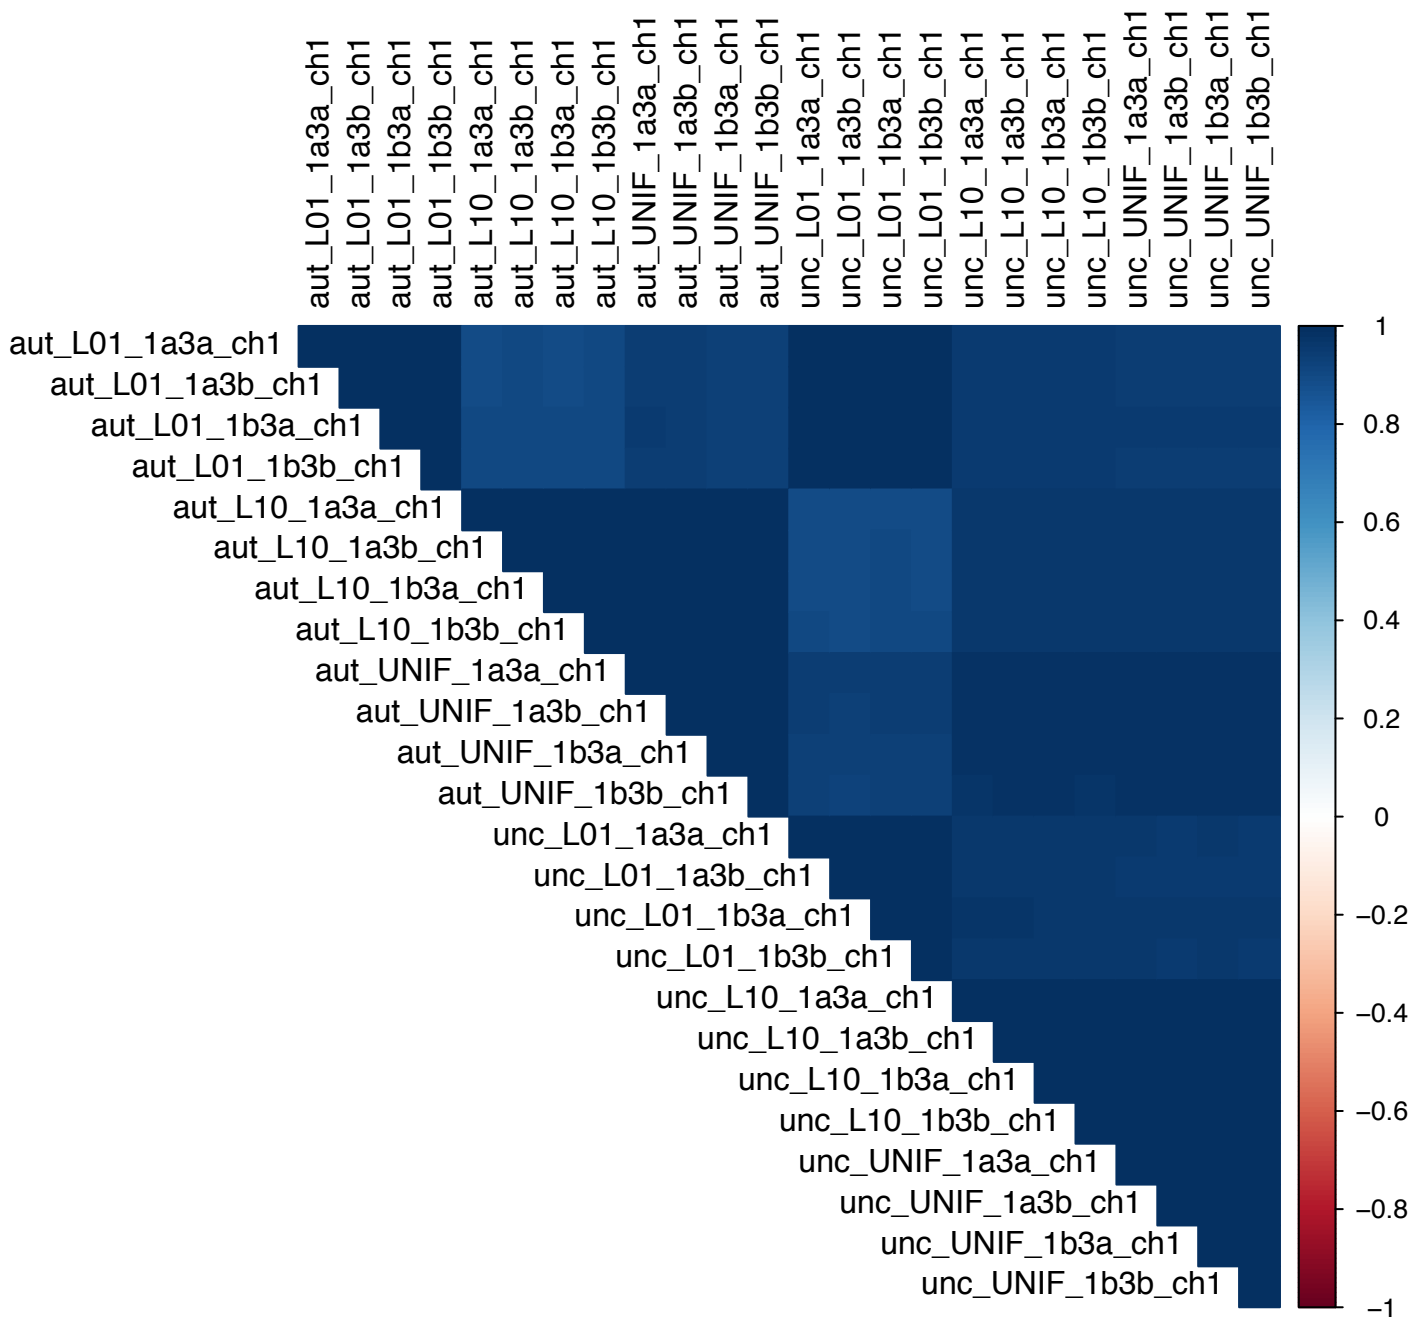

Supplement: 12862_2019_1573_MOESM6_ESM.pdf [file 12862_2019_1573_MOESM6_ESM.pdf]
