# Supplementary material for: A mitogenomic phylogeny of chitons (Mollusca: Polyplacophora)
Source: BMC Evol Biol. 2020 Feb 5;20:22. doi: 10.1186/s12862-019-1573-2 (PMC7003433; doi:10.1186/s12862-019-1573-2)
Supplement: Supplementary file 2 — Additional file 2. PCR primers and mitogenome annotation. Information on universal and species-specific PCR primers and annotation of newly sequenced mitogenomes. [file 12862_2019_1573_MOESM2_ESM.xlsx]

## Sheet: Primers
Supplementary File 2. Primers and long-PCR amplification strategy
Universal primer pairs
	Locus	Primer name	Sequence 5'-3'
	cox1	LCO1490 (L-COI)	GGTCAACAAATCATAAAGATATTGG	Folmer et al. 1994
		HCO2198 (H-COI)	TAAACTTCAGGGTGACCAAAAAATCA
	rrnL	16SarL (L-16S)	CGCCTGTTTATCAAAAACAT	Palumbi, 1996
		16SbrH (H-16S)	CCGGTCTGAACTCAGATCACGT
	cob	F-151 (cob)	TGTGGRGCNACYGTWATYACTAA	Merritt et al. 1998
		R-250 (cob)	AANAGGAARTAYCAYTCNGGYTG
	cox3	Molluscox3F	TGGTGRCGAGATGTTRTTCG	Irisarri et al. 2014
		Molluscox3R	TCSACGAARTGTCARTATCARG
Specific primer pairs for long-PCR
Voucher	Species	Primer name	Sequence 5'-3'	Fragment (bp)
de2078	Acanthochitona avicula	2078-COBF	TGCAGTAAACAACGCAACATTAACACG	cob – rrnL (12601)
		2078-16SR	TGTAAAAGAGACAGGTATGTTTTCGTCAAG
		2078-16SF	TGAAAGCTTGWATGAATGGCTTGACG	rrnL – cob (2909)
		2078-COBR	TCTGGGTCTGTTAATAAATTAGGTTCG
de1015	Callochiton steinenii	1015-COX3F	ACCTTTTACAATTGCTGACGGTTGTTACG	cox3 – cox1 (2663)
		CALLOCH-COX1R	ACGGTCAGTTAAAAGTATTGTAATTCCTCC
		CALLOCH-COX1F	ACTGTCTATCCGCCTTTAGCAAGAAAC	cox1 – cob (7009)
		CALLOCH-COBF	GATCAAATAACCCTTTAGGGATTAATAGAGAC
		CALLOCH-COBR	TATGWACAGGAGTAACTAAAGGGTTAGC	cob – rrnL (2703)
		CALLOCH-16SF	ATTAATAGAAAAGTTACCGTAGGGATAACAGC
de0160	Acanthopleura echinata	POLYCOX3F	GTAGARTTTAGHCCTTGRCC	cox3 – cox1 (2915)
		0160-COX1R	AGGATAAACTGTTCAACCAGTGCCAAC
		0093-COX1F	AGCTGAATTAGGACAGCCTGGAGC	cox1 – cob (7409)
		0160-COBF	GTAGTACAATGAATTTGAGGGGGTTTTGC
		0160-COBR	TGAATGTGTACTGGGGTCACTAGGGGATTTGC	cob – rrnL (3024)
		ENOP-16SF	ACGGCCGCAGTACCCTGACTGTGC
		ENOP-16SR	CAACATCGAGGTCGCAATCTTTTCC	rrnL – control region (2508)
		GluF1	GCACWNTTGATTTTCATTCAAYYRG
de1592	Chiton albolineatus	1592-COX1F	CAACCTGGAGCGTTACTAGGAGATG	cox1 – cob (7383)
		1592-COBF	ACCTTATATTGGTAAGAGTGTAGTCGAATGG
		1592-COBR	TACTGGAGTAACTAAAGGGTTAGCAGG	cob – rrnL (2946)
		1592-16SF	TTTAATTGAAGGCTAGAATGAATGGTTTGACG
		1592CA16sR	CTTTCAAGCTCGATAGGGTCTTTTCGTC	rrnL – cox1 (5342)
		1592CAcox1R	ATAGACTGTTCAACCTGTTCCAGCTCC
de1579	Tonicia forbesii	POLYCOX3F	GTAGARTTTAGHCCTTGRCC	cox3 – cox1 (2725)
		1579-COX1R	CGTTCTAGCTGCATCCCAACTC
		1579-COX1F	GGCTCCAGATATAGCCTTTCCTCG	cox1 – cob (7261)
		1579-COBF	CAGTGAATTTGAGGAGGTTTCGCAGTAG
		1579-COX1F	GGCTCCAGATATAGCCTTTCCTCG	cob – rrnL (2816)
		1579-16SF	ACGGCCGCAGTACCCTGACTGTGC
		1579-16SR	AAGTTCGACAGGGTCTTTTCGTCT	rrnL – control region (2267)
		GluF1	GCACWNTTGATTTTCATTCAAYYRG
de1307	Hermiarthrum setulosum	1307-COX1F	TCAGCTATACAATGTAATTGTAACTGCTCATGC	cox1 – cob (7492)
		1307-COBF	AGGATTTGCTCTAGACAGAGCAACCCTAAC
		1307-COBR	AGGGGTTAGCTGGAATAAAGTTTTCAGGGTC	cob – rrnL (2361)
		1307-16SF	TAGTTGGGGCGACGGAAGAACATATAAAGC
		1307H16SR	AGAAATTACGCTGTTATCCCTGCGGTAG	rrnL – cox1 (7125)
		1307HScox1R	AGTATAGTAATTCCTCCTGCCAAAACCGG
de1309	Tonicina zschaui	1309-COX3F	GGTATGGTTTGGCCGCCTGTG	cox3 – cox1 (3284)
		1309-COX1R	ACAAACGCTCTATTTGCATTCCTGCTC
		1309-COX1F	AGATCTGGGATAGTGGGTACTGC	cox1 – cob (7408)
		1309-COBF	ACGATTTTTTGCACTTCACTATCTAACACC
		1309-COBR	GTCTGAGAGTAAGTTGGGGGA	cob – rrnL (2932)
		1309-16SF	AAGGCTAGAATGAATGGCTTGACG
de2183	Leptochiton nexus	LEPT-COX1F	TAGCTTCKGCAGCWGTRGAAAGAGG	cox1 – cob (7285)
		LEPT-COBF	AATGRSTTTGAGGRGGNTTTGCWGTAG
		2183-COBR	ATATGAACAGGGGTTACCAAAGGGTTAGCTGG	cob – rrnL (3042)
		LEPT-16SF	ACGGCCGCAGTACCCTGACTGTGC
		LEPT-16SR	5'-AGGGTCTTTTCGTCTWTCAAYTTYATTYAGGTC	rrnL – cox1 (5923)
		LEPT-COX1R	TAGCMCCAGCMARAACAGGAAGAG
de0105	Nuttallochiton mirandus	NUTMIR-COX3F	GCCGCCTGTAGGTGTTGAGC	cox3 – cox1 (2694)
		NUTMIR-COX1R	CCAGCAAGATGTAAAGAAAAGATAGCAAG
		NUTMIR-COX1F	TGTATAATGTAATTGTTACTGCCCACGC	cox1 – cob (7337)
		NUTMIR-COBF	GTTCAATGAATTTGGGGAGGGTTCG
		NUTMIR-COBR	ACTAAAGGGTTAGCTGGAATAAAATTTTCGG	cob – rrnL (3084)
		NUTMIR-16SR	TTAAGCTCGATAGGGTCTTTTCGTCT
de0097	Plaxiphora albida	POLYCOX3F	GTAGARTTTAGHCCTTGRCC	cox3 – cox1 (3151)
		0097-COX1R	TGAGCAATATAGTAATACCCCCAGC
		0097-COX1F	TGCTCCTGATATGGCTTTTCCTC	cox1 – cob (7183)
		PLAXI-COBF	TCGGTTTTTTGCTTTTCATTATTTAGCTCC
		PLAXI-COBR	TGATTCCCAAAGGATTATTAGAACCTC	cob – rrnL (2536)
		PLAXI-16SF	AGAAAAGTTACCGTAGGGATAACAGC
de5133	Plaxiphora albida	97_cox3R	AAATCATTCCTCATCGTAGTCCGCGAG	cox3 – rrnL (2882)
		97_16SR	AATCCAACATCGAGGTCGCAAACTCTTC
de100	Nierstraszella lineata	0100-COX1F	TGGACAACCAGGAACTCTGTTAGG	cox1 – cob (8169)
		0100-COBF	CTTCACGGACAAGGGGCAAATAAC
		0100-COBR	ACAGGCGTTATTAAAGGATCGGCAGG	cob – rrnL (2985)
		0100-16SF	ATGGCCGCAGTACTTTGACTGTGC
		0100-16SR	TTCTACACCCTTTAGTAACTTTAATCCAACATCG	rrnL – cox1 (5742)
		0100-COX1R	TCGGTCGGTTAAAAGTATGGTAATAGCTCC
de1424	Hanleyella oldroydi	1424-COBF	TCTACATGAAACAGGACCGAATAACC	cob – rrnL (13001)
		1424-16SR	TCAATAATATCTAGGCCTCTGCACC
		1424-16SF	CTAGAATGAATGGTTTGACGAGAGC	rrnL – cob (2825)
		1424-COBR	TCGCTTTTAATTCCTAGTGGGTTATTC
de1499	Dendrochiton gothicus	1499DGcox3F	CAGTAGGTTTAGCTGCTTGGATGCATG	cox3 – cox1 (3320)
		1499DGcox1R	GCTCTAAAGGCATTCCTTCCCAACG
		1499DGcox1F	TTGGAGGATTTGGGAATTGGTTGGTACC	cox1 – nad4 (5676)
		1499DGnad4F	ATTCCAGTTACGATTAATCCTGCTTCAC

## Sheet: Annotation
Annotation of newly sequenced mitochondrial genomes.
Dendrochiton gothicus										Nuttallochiton mirandus										Plaxiphora albida (de0097)										Plaxiphora albida (de5133)										Acanthopleura echinata
Product (gene)	Type	Start	Stop	Lenght	Intergenic	Strand	Start Codon	Stop Codon		Product (gene)	Type	Start	Stop	Lenght	Intergenic	Strand	Start Codon	Stop Codon		Product (gene)	Type	Start	Stop	Lenght	Intergenic	Strand	Start Codon	Stop Codon		Product (gene)	Type	Start	Stop	Lenght	Intergenic	Strand	Start Codon	Stop Codon		Product (gene)	Type	Start	Stop	Lenght	Intergenic	Strand	Start Codon	Stop Codon
COX1	CDS	1	1533	1533	12	+	ATG	TAA		COX1	CDS	2243	3772	1530	18	+	ATG	TAA		COX1	CDS	2528	4063	1536	9	+	ATG	TAA												COX1	CDS	2534	4072	1539	3	+	ATG	TAA
COX2	CDS	1546	2234	689	0	+	ATG	TA–		COX2	CDS	3791	4481	691	0	+	ATG	T––		COX2	CDS	4073	4759	687	3	+	ATG	TAA												COX2	CDS	4076	4762	687	6	+	ATG	TAG
trnD	tRNA	2235	2298	64	0	+				trnD	tRNA	4482	4545	64	0	+				trnD	tRNA	4763	4826	64	0	+														trnD	tRNA	4769	4833	65	0	+
ATP8	CDS	2299	2460	162	7	+	ATG	TAG		ATP8	CDS	4546	4701	156	23	+	ATG	TAG		ATP8	CDS	4827	4988	162	9	+	ATG	TAA												ATP8	CDS	4834	4995	162	15	+	ATG	TAG
ATP6	CDS	2468	3163	696	37	+	ATG	TAA		ATP6	CDS	4725	5420	696	34	+	ATG	TAG		ATP6	CDS	4998	5693	696	29	+	ATG	TAA												ATP6	CDS	5011	5709	699	36	+	ATG	TAA
trnF	tRNA	3201	3266	66	0	–				trnF	tRNA	5455	5519	65	0	–				trnF	tRNA	5723	5786	64	0	–														trnF	tRNA	5746	5814	69	4	–
ND5	CDS	3267	4981	1715	0	–	TAG	TA–		ND5	CDS	5520	7233	1714	0	–	ATG	T––		ND5	CDS	5787	7500	1714	0	–	ATG	T––												ND5	CDS	5819	7534	1716	0	–	TTG	TAA
trnH	tRNA	4982	5045	64	0	–				trnH	tRNA	7234	7296	63	0	–				trnH	tRNA	7501	7564	64	0	–														trnH	tRNA	7535	7597	63	0	–
ND4	CDS	5046	6392	1347	-7	–	GTG	TAA		ND4	CDS	7297	8642	1346	-7	–	GTG	TA–		ND4	CDS	7565	8907	1343	-7	–	GTG	TA–												ND4	CDS	7598	8945	1348	-7	–	GTG	T––
ND4L	CDS	6386	6688	303	4	–	ATG	TAG		ND4L	CDS	8636	8938	303	4	–	ATG	TAG		ND4L	CDS	8901	9203	303	4	–	ATG	TAG												ND4L	CDS	8939	9241	303	5	–	ATG	TAG
trnT	tRNA	6693	6757	65	-1	+				trnT	tRNA	8943	9007	65	-1	+				trnT	tRNA	9208	9270	63	20	+														trnT	tRNA	9247	9311	65	-1	+
trnS (tga)	tRNA	6757	6823	67	3	–				trnS (tga)	tRNA	9007	9072	66	0	–				trnS (tag)	tRNA	9291	9355	65	0	–														trnS (tga)	tRNA	9311	9378	68	5	–
CYTB	CDS	6827	7966	1140	0	–	ATG	TAA		CYTB	CDS	9073	10210	1138	0	–	ATG	T––		CYTB	CDS	9356	10494	1139	0	–	ATG	TA–												CYTB	CDS	9384	10526	1143	5	–	ATG	TAA
ND6	CDS	7967	8465	499	6	–	ATG	T––		ND6	CDS	10211	10712	502	5	–	ATG	T––		ND6	CDS	10495	10996	502	5	–	ATG	T––												ND6	CDS	10532	11029	498	4	–	ATG	TAA
trnP	tRNA	8472	8531	60	-3	+				trnP	tRNA	10718	10782	65	2	+				trnP	tRNA	11002	11065	64	-9	+	ATG	TAG												trnP	tRNA	11034	11098	65	-8	+
ND1	CDS	8529	9479	951	0	–	ATG	TAA		ND1	CDS	10785	11720	936	0	–	ATG	TAA		ND1	CDS	11057	12007	951	0	–														ND1	CDS	11091	12035	945	7	–	ATG	TAA
trnL (taa)	tRNA	9480	9545	66	0	–				trnL (taa)	tRNA	11721	11785	65	0	–				trnL (taa)	tRNA	12008	12071	64	0	–														trnL (taa)	tRNA	12043	12106	64	0	–
trnL (tag)	tRNA	9546	9610	65	0	–				trnL (tag)	tRNA	11786	11852	67	0	–				trnL (tag)	tRNA	12072	12137	66	0	–														trnL (tag)	tRNA	12107	12175	69	0	–
16S ribosomal RNA	rRNA	9611	10885	1275	0	–				16S ribosomal RNA	rRNA	11853	12511	659	0	–				16S ribosomal RNA	rRNA	12138	12564	427	0	–				16S ribosomal RNA	rRNA	1	1068	1068	0	–				16S ribosomal RNA	rRNA	12176	13471	1296	0	–
trnV	tRNA	10886	10951	66	0	–																								trnV	tRNA	1069	1134	66	0	–				trnV	tRNA	13472	13540	69	0	–
12S ribosomal RNA	rRNA	10952	11799	848	0	–																								12S ribosomal RNA	rRNA	1135	2000	866	0	–				12S ribosomal RNA	rRNA	13541	14400	860	0	–
trnM	tRNA	11800	11865	66	4	–																								trnM	tRNA	2001	2063	63	0	–				trnM	tRNA	14401	14466	66	1	–
trnC	tRNA	11870	11933	64	3	–																								trnC	tRNA	2064	2125	62	7	–				trnC	tRNA	14468	14528	61	0	–
trnY	tRNA	11937	12000	64	0	–																								trnY	tRNA	2133	2195	63	1	–				trnY	tRNA	14529	14595	67	0	–
trnW	tRNA	12001	12066	66	0	–																								trnW	tRNA	2197	2259	63	1	–				trnW	tRNA	14596	14664	69	2	–
trnQ	tRNA	12067	12132	66	3	–																								trnQ	tRNA	2261	2327	67	2	–				trnQ	tRNA	14667	14733	67	7	–
trnG	tRNA	12136	12201	66	14	–																								trnG	tRNA	2330	2396	67	0	–				trnG	tRNA	14741	14806	66	9	–
trnE	tRNA	12216	12280	65	135	–																								trnE	tRNA	2397	2491	95	23	–				trnE	tRNA	14816	14848	32	133	–
COX3	CDS	12416	13195	780	7	+	ATG	TAA		COX3	CDS	1	438	438	13	+	–––	TAG		COX3	CDS	1	735	735	10	+	–––	TAA												COX3	CDS	1	741	741	3	+	–––	TAG
trnK	tRNA	13203	13261	59	0	+				trnK	tRNA	452	514	63	0	+				trnK	tRNA	746	805	60	0	+														trnK	tRNA	745	810	66	-4	+
trnA	tRNA	13262	13327	66	1	+				trnA	tRNA	515	580	66	9	+				trnA	tRNA	806	869	64	3	+														trnA	tRNA	807	872	66	10	+
trnR	tRNA	13329	13397	69	9	+				trnR	tRNA	590	656	67	-1	+				trnR	tRNA	873	942	70	4	+														trnR	tRNA	883	941	59	4	+
trnN	tRNA	13407	13473	67	-2	+				trnN	tRNA	656	718	63	0	+				trnN	tRNA	947	1013	67	-2	+														trnN	tRNA	946	1009	64	0	+
trnI	tRNA	13472	13538	67	0	+				trnI	tRNA	719	784	66	0	+				trnI	tRNA	1012	1077	66	0	+														trnI	tRNA	1010	1074	65	1	+
ND3	CDS	13539	13899	361	0	+	ATG	T––		ND3	CDS	785	1138	354	12	+	ATG	TAG		ND3	CDS	1078	1438	361	0	+	ATG	T––												ND3	CDS	1076	1432	357	9	+	ATG	TAG
trnS (gct)	tRNA	13900	13967	68	0	+				trnS (gct)	tRNA	1151	1217	67	0	+				trnS (gct)	tRNA	1439	1506	68	0	+														trnS (gct)	tRNA	1442	1509	68	3	+
ND2	CDS	13968	14987	1020	301	+	GTG	TAA		ND2	CDS	1218	2240	1023	2	+	ATG	TAA		ND2	CDS	1507	2527	1021	0	+	ATG	T––												ND2	CDS	1513	2532	1020	1	+	TTG	TAA
[truncated: 81 more columns]
